# Supplementary material for: Endoscopic or laparoscopic resection for small gastrointestinal stromal tumors: a cumulative meta-analysis
Source: PubMed Central journal article supplement — Chin Med J (Engl). 2020 Sep 3;133(22):2731–42. doi: 10.1097/CM9.0000000000001069 (PMC7725529; doi:10.1097/cm9.0000000000001069), 2020-09-03
Supplement: cm9-133-2731-s001.pdf [file cm9-133-2731-s001.pdf]

Supplementary Table 1. Other clinical and pathological characteristics of cohort studies on comparison between ER and LAP/LECS

| Author      | Endoscopic method | Laparoscopic method          | Tumor location |    | Mitotic index |       |    | Types of Complications |                                       |    | Severity of Complications |       |    | Follow-up      |                |
|-------------|-------------------|------------------------------|----------------|----|---------------|-------|----|------------------------|---------------------------------------|----|---------------------------|-------|----|----------------|----------------|
|             |                   |                              | Location       | ER | LA            | /50HP | ER | LA                     | Type                                  | ER | LAP                       | Grade | ER |                | LAP            |
|             |                   |                              |                | P  | F             |       | P  |                        |                                       |    |                           |       |    |                |                |
| Wang et al  | Full-thickness ER | LAP wedge resection          | Antrum         | 2  | 4             | N/A   |    |                        | Wound disruption                      | 3  | 0                         | I     |    |                | N/A            |
|             |                   |                              | Body           | 26 | 16            |       |    |                        | Localized peritonitis                 | 0  | 3                         | II    | 14 | 6              |                |
|             |                   |                              | Fundus         | 38 | 23            |       |    |                        | Gastrointestinal bleeding             | 0  | 3                         | III   | 3  |                |                |
|             |                   |                              |                |    |               |       |    |                        | Pneumatosis                           | 5  | 0                         | IV    |    |                |                |
|             |                   |                              |                |    |               |       |    |                        | Pneumatosis and localized peritonitis | 9  | 0                         | V     |    |                |                |
| Jeong et al | ESD               | LAP wedge resection (n=53)   | Proximal       | 17 |               | ≤5    |    | 65                     | N/A                                   |    |                           | I     |    | ER:<br>49.3 m  |                |
|             |                   | LAP distal gastrectomy (n=3) | Body           |    | 62            | 6–10  |    | 13                     |                                       |    |                           | II    | 1  | 6              | LAP:<br>37.0 m |
|             |                   | LAP total gastrectomy (n=1)  | Distal         |    | 5             | >10   |    | 6                      |                                       |    |                           | III   | 1  |                |                |
|             |                   |                              |                |    |               |       |    |                        |                                       |    | IV                        |       |    |                |                |
|             |                   |                              |                |    |               |       |    |                        |                                       |    |                           | V     |    |                |                |
| Dong et al  | Full-thickness ER | LAP intragastric surgery     | Proximal       | 8  | 6             | ≤5    | 10 | 6                      | N/A                                   |    |                           | N/A   |    | Mean<br>12.8 m |                |
|             |                   |                              | Body           | 1  | 2             | 6–10  | 0  | 2                      |                                       |    |                           |       |    |                |                |
|             |                   |                              | Distal         | 1  | 0             | >10   | 0  |                        |                                       |    |                           |       |    |                |                |
| Wu et al    | Full-thickness ER | LAP wedge resection,         | Antrum         | 13 | 15            | N/A   |    |                        | N/A                                   |    |                           | I     |    | N/A            |                |
|             |                   | LAP sleeve gastrectomy       | Body           | 23 | 19            |       |    |                        |                                       |    |                           | II    | 2  |                |                |
|             |                   | LAP partial gastrectomy      | Fundus         | 14 | 8             |       |    |                        |                                       |    |                           | III   |    |                |                |
|             |                   |                              |                |    |               |       |    |                        |                                       |    | IV                        |       |    |                |                |
|             |                   |                              |                |    |               |       |    |                        |                                       |    |                           | V     |    |                |                |

|                  |                            |                                                                       |           |     |    |      |    |    |                              |   |   |     |   |   |                                 |
|------------------|----------------------------|-----------------------------------------------------------------------|-----------|-----|----|------|----|----|------------------------------|---|---|-----|---|---|---------------------------------|
| Meng et al       | ESD                        | N/A                                                                   | Antrum    | 2   | 2  | N/A  |    |    | N/A                          |   |   |     |   |   | ER:<br>7 m<br>LAP:<br>6 m       |
|                  |                            |                                                                       | Body      | 9   | 16 |      |    |    |                              |   |   |     |   |   |                                 |
|                  |                            |                                                                       | Fundus    | 61  | 30 |      |    |    |                              |   |   |     |   |   |                                 |
| Dai et al        | N/A                        | N/A                                                                   | Cardia    | 34  | 5  | ≤5   | 59 | 24 | Bleeding                     | 2 | 0 | N/A |   |   | ER:<br>32.9 m<br>LAP:<br>35.2 m |
|                  |                            |                                                                       | Antrum    | 7   | 21 | 6–10 | 16 | 4  | Perforation                  | 3 | 0 |     |   |   |                                 |
|                  |                            |                                                                       | Body      | 59  | 26 | >10  | 2  | 0  | Infection                    | 6 | 1 |     |   |   |                                 |
|                  |                            |                                                                       | Fundus    | 154 | 35 |      |    |    | Other                        | 4 | 1 |     |   |   |                                 |
| Meng et al       | ESD                        | N/A                                                                   | Antrum    | 8   | 3  | N/A  |    |    | Perforation or<br>Bleeding   | 2 | 1 | N/A |   |   | ER:<br>3.34 y<br>LAP:<br>3.41 y |
|                  |                            |                                                                       | Body      | 13  | 18 |      |    |    |                              |   |   |     |   |   |                                 |
|                  |                            |                                                                       | Fundus    | 54  | 30 |      |    |    |                              |   |   |     |   |   |                                 |
| Gluzman<br>et al | ESD (n=6)                  | LAP wedge resection<br>(n=30)                                         | Stomach   | 21  | 36 | N/A  |    |    | Bleeding                     |   | 1 | I   |   |   | N/A                             |
|                  | Tunnel ER (n=8)            | LAP partial gastrectomy<br>(n=4)                                      | Intestine | 1   | 4  |      |    |    | Perforation                  | 2 |   | II  |   |   |                                 |
|                  | Full-thickness ER<br>(n=8) | LAP sleeve gastrectomy<br>(n=3)<br>LAP small bowel<br>resection (n=3) |           |     |    |      |    |    | Pharyngeal wall tear         | 1 |   | III | 3 | 3 |                                 |
|                  |                            |                                                                       |           |     |    |      |    |    | Resistant<br>pylorospasm     |   | 1 | IV  |   |   |                                 |
|                  |                            |                                                                       |           |     |    |      |    |    | Adhesive obstruction         |   | 1 | V   |   |   |                                 |
| He et al         | ESD                        | N/A                                                                   | Antrum    | 11  | 19 | ≤5   | 36 | 45 | Bleeding                     | 2 | 3 | N/A |   |   | >12 m                           |
|                  |                            |                                                                       | Body      | 32  | 38 | >15  | 26 | 39 | Infection                    | 1 | 2 |     |   |   |                                 |
|                  |                            |                                                                       | Fundus    | 19  | 27 |      |    |    |                              |   |   |     |   |   |                                 |
| Yin et al        | ESD                        | LAP wedge resection                                                   | Proximal  | 24  | 18 | ≤5   | 41 | 22 | Bleeding                     | 2 | 1 | I   |   |   | 69.5 m                          |
|                  |                            | LAP partial gastrectomy                                               | Body      | 18  | 10 | 6–10 | 3  | 6  | Perforation                  | 3 | 0 | II  | 8 | 1 |                                 |
|                  |                            | LAP total gastrectomy                                                 | Distal    | 4   | 2  | >10  | 2  | 2  | Infection                    | 2 | 0 | III |   |   |                                 |
|                  |                            |                                                                       |           |     |    |      |    |    | Severe sour<br>regurgitation | 1 | 0 | IV  |   |   |                                 |
|                  |                            |                                                                       |           |     |    |      |    |    |                              |   |   | V   |   |   |                                 |
| Chen et al       | ESD                        | LAP wedge resection                                                   | Cardia    | 4   | 11 | ≤5   | 32 | 59 | N/A                          |   |   | I   |   |   | ER:<br>45 m                     |

|             |                   |      |          |    |    |      |    |    |                        |   |   |     |    |   |        |
|-------------|-------------------|------|----------|----|----|------|----|----|------------------------|---|---|-----|----|---|--------|
|             |                   |      | Fundus   | 18 | 22 | 6–10 | 3  | 6  |                        |   |   | II  | 1  | 4 | LAP:   |
|             |                   |      | Body     | 6  | 17 | >10  | 0  | 1  |                        |   |   | III |    |   | 60 m   |
|             |                   |      | Antrum   | 7  | 16 |      |    |    |                        |   |   | IV  |    |   |        |
|             |                   |      |          |    |    |      |    |    |                        |   |   | V   |    |   |        |
| Zhao et al  | Full-thickness ER | N/A  | Cardia   | 6  | 3  | N/A  |    |    | Bleeding               | 0 | 1 | N/A |    |   | ER:    |
|             |                   |      | Fundus   | 55 | 36 |      |    |    | Pneumoperitoneum       | 4 | 0 |     |    |   | 29 m   |
|             |                   |      | Body     | 20 | 18 |      |    |    | Infection              | 1 | 3 |     |    |   | LAP:   |
|             |                   |      | Antrum   | 4  | 6  |      |    |    |                        |   |   |     |    |   | 36 m   |
| Balde et al | ESD               | LECS | Proximal | 21 | 17 | N/A  |    |    | Bleeding               | 6 | 1 | N/A |    |   | Mean   |
|             |                   |      | Body     | 2  | 8  |      |    |    | Perforation            | 2 | 0 |     |    |   | 57.9 m |
|             |                   |      | Distal   | 7  | 5  |      |    |    | Reoperation            | 4 | 0 |     |    |   |        |
|             |                   |      |          |    |    |      |    |    | Other                  | 8 | 1 |     |    |   |        |
| Yin et al   | ESD               | LECS | Proximal | 24 | 9  | ≤ 5  | 41 | 12 | Bleeding               | 2 | 0 | I   |    |   | 69.5 m |
|             |                   |      | Body     | 18 | 5  | 6–10 | 3  | 3  | Perforation            | 3 | 0 | II  | 8  | 2 |        |
|             |                   |      | Distal   | 4  | 1  | >10  | 2  | 0  | Infection              | 2 | 1 | III |    |   |        |
|             |                   |      |          |    |    |      |    |    | Obstruction            | 0 | 1 | IV  |    |   |        |
|             |                   |      |          |    |    |      |    |    |                        |   |   | V   |    |   |        |
| Ojima et al | EIGS              | LECS | N/A      |    |    | N/A  |    |    | Gastric mucosal injury | 3 | 0 | I   |    |   | >12 m  |
|             |                   |      |          |    |    |      |    |    | Esophageal tear        | 1 | 0 | II  |    |   |        |
|             |                   |      |          |    |    |      |    |    | Anastomotic leakage    | 0 | 1 | III | 10 | 2 |        |
|             |                   |      |          |    |    |      |    |    | Bleeding               | 3 | 0 | IV  |    |   |        |
|             |                   |      |          |    |    |      |    |    | Infection              | 3 | 0 | V   |    |   |        |

Severity of Complications was assessed according to Clavien-Dindo system. ER: endoscopic resection; ESD: endoscopic submucosal dissection; LAP: laparoscopic resection; LECS: laparoscopic and endoscopic cooperative surgery; N/A: not available; HPF: high-power fields; EIGS: endoscopic intragastric surgery.
